# Supplementary material for: Effects of Mn doping on electronic and quantum transport in PbPdO2 thin films
Source: Royal Society of Chemistry journal article supplement (doi:10.1039/d3ra08039k), 2024-01-01
Supplement: d3ra08039k1.pdf [file d3ra08039k1.pdf]

## Supplementary Information

### Effects of Mn doping on electronic and quantum transport in PbPdO<sub>2</sub> thin films

Liqiang Zeng<sup>a, b</sup>, Wenti Guo<sup>a, b</sup>, Hai Jia<sup>a, b</sup>, Yue Chen<sup>a, b</sup>, Shuiyuan Chen<sup>a, c</sup>, Jian-Min Zhang<sup>a, c, \*</sup>, and Zhigao Huang<sup>a, c, \*</sup>

<sup>a</sup> *Fujian Provincial Key Laboratory of Quantum Manipulation and New Energy Materials, College of Physics and Energy, Fujian Normal University, Fuzhou, 350117, China*

<sup>b</sup> *Fujian Provincial Engineering Technical Research Centre of Solar-Energy Conversion and Stored Energy, Fuzhou, 350117, China*

<sup>c</sup> *Fujian Provincial Collaborative Innovation Center for Advanced High-Field Superconducting Materials and Engineering, Fuzhou, 350117, China*

*E-mail: jmzhang@fjnu.edu.cn; zghuang@fjnu.edu.cn*

1. XRD of  $\text{PbPd}_{1-x}\text{Mn}_x\text{O}_2$  ( $x = 0, 0.05, 0.1, 0.15$ ) powders.

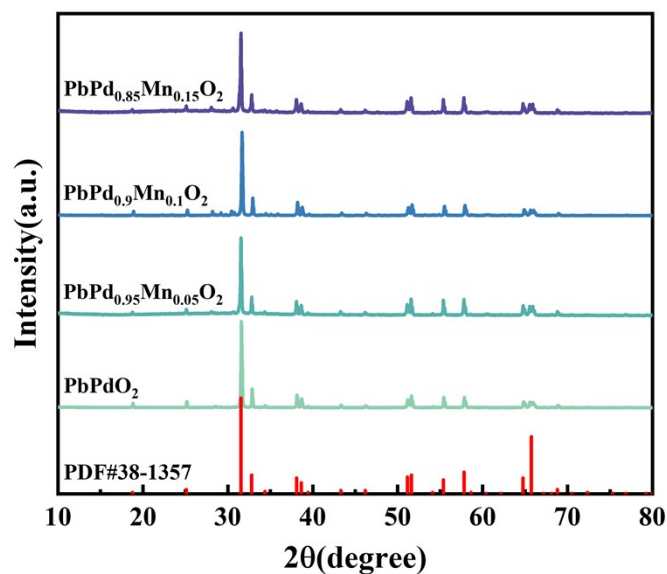

**Fig. S1** X-ray diffraction (XRD) patterns of  $\text{PbPd}_{1-x}\text{Mn}_x\text{O}_2$  ( $x = 0, 0.05, 0.1, 0.15$ ) powders which is used to prepare PLD targets.

The XRD patterns of the powder accord with the standard spectrum of  $\text{PbPdO}_2$  (PDF#38-1357) phase, indicating that we have successfully prepared  $\text{PbPd}_{1-x}\text{Mn}_x\text{O}_2$  ( $x = 0, 0.05, 0.1, 0.15$ ) powders.

2. *In situ* XPS spectra of O 1s for PbPd<sub>0.9</sub>Mn<sub>0.1</sub>O<sub>2</sub> thin film.

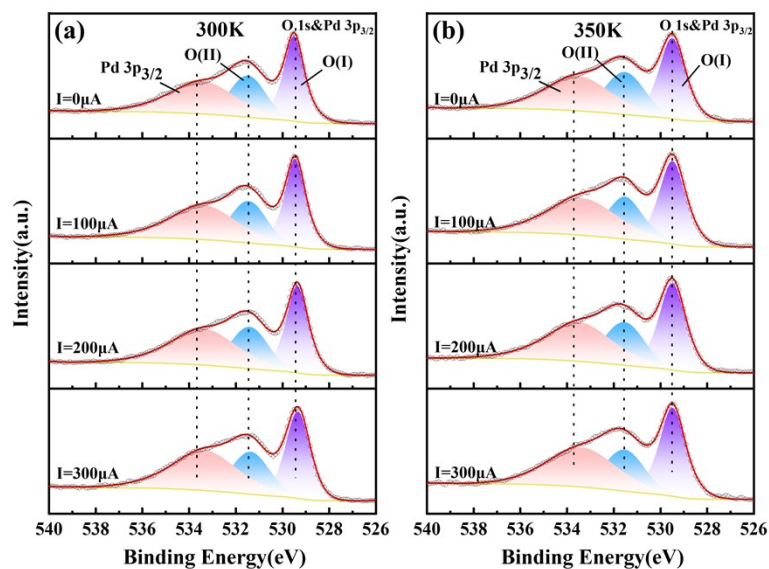

**Fig. S2** *In situ* XPS spectra of O 1s of PbPd<sub>0.9</sub>Mn<sub>0.1</sub>O<sub>2</sub> thin film at 300 K (a) and 350 K (b) under I = 0, 100, 200, 300  $\mu$ A.

**Table S1** The percentage of the O(II) peak area (oxygen vacancy) to the total oxygen peak area (O(I)+O(II)) shown in Fig. S2.

| Current     | 300 K | 350 K |
|-------------|-------|-------|
| 0 $\mu$ A   | 42.3% | 42.6% |
| 100 $\mu$ A | 42.4% | 41.8% |
| 200 $\mu$ A | 42.4% | 40.9% |
| 300 $\mu$ A | 42.2% | 39.7% |

3. *In situ* XPS spectra of O 1s for PbPd<sub>0.85</sub>Mn<sub>0.15</sub>O<sub>2</sub> thin film.

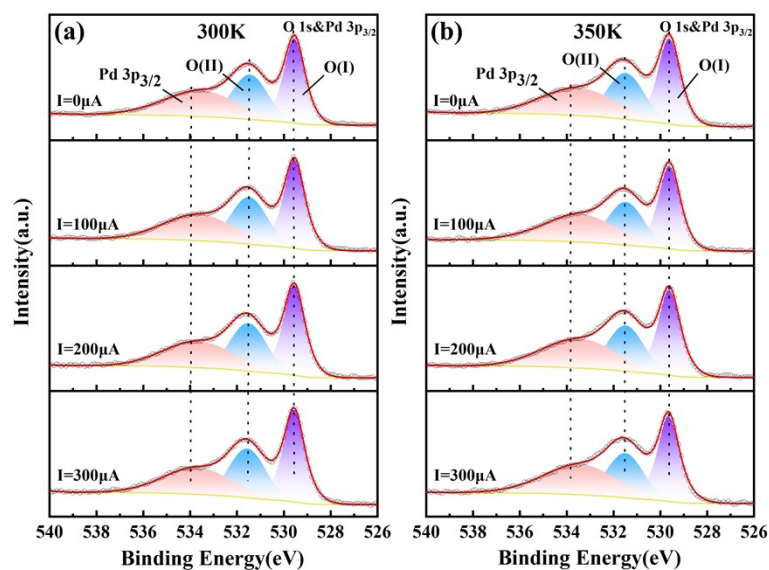

**Fig. S3** *In situ* XPS spectra of O 1s of PbPd<sub>0.85</sub>Mn<sub>0.15</sub>O<sub>2</sub> thin film at 300 K (a) and 350 K (b) under I = 0, 100, 200, 300  $\mu$ A.

**Table S2** The percentage of the O(II) peak area (oxygen vacancy) to the total oxygen peak area (O(I)+O(II)) shown in Fig. S3.

| Current     | 300 K | 350 K |
|-------------|-------|-------|
| 0 $\mu$ A   | 45.3% | 45.3% |
| 100 $\mu$ A | 45.0% | 44.6% |
| 200 $\mu$ A | 45.3% | 44.2% |
| 300 $\mu$ A | 45.0% | 43.8% |

4. XPS spectra of Pb 4f, Pd 3d and Mn 2p for  $\text{PbPd}_{1-x}\text{Mn}_x\text{O}_2$  thin film.

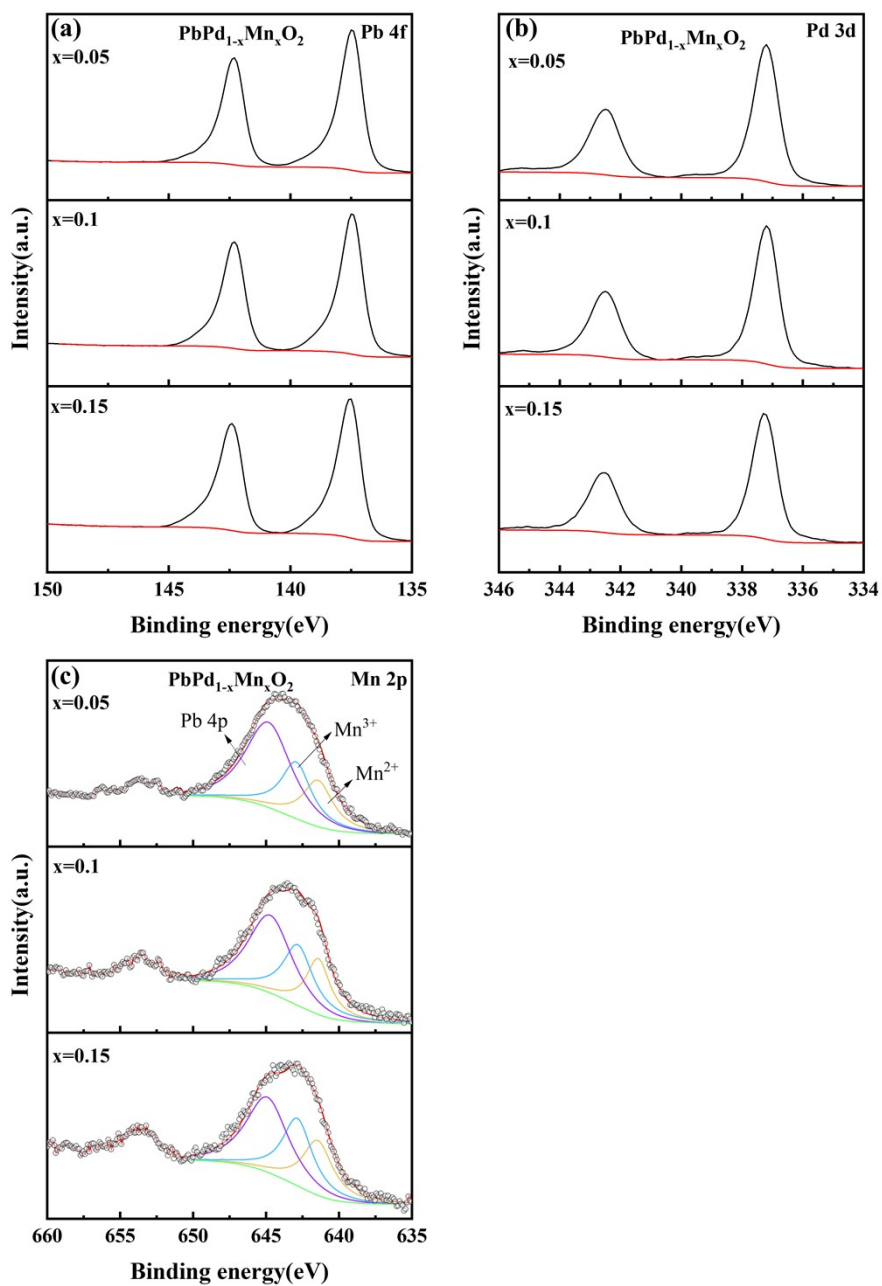

**Fig. S4** XPS spectra of (a) Pb 4f, (b) Pd 3d and (c) Mn 2p for  $\text{PbPd}_{1-x}\text{Mn}_x\text{O}_2$  ( $x=0.05, 0.1, 0.15$ ) thin film.
